# Supplementary material
Source: publisher site journal article supplement (https://www.dovepress.com/article/437256)
Supplement: Supplementary file 1 [file get_supplementary_file.php]

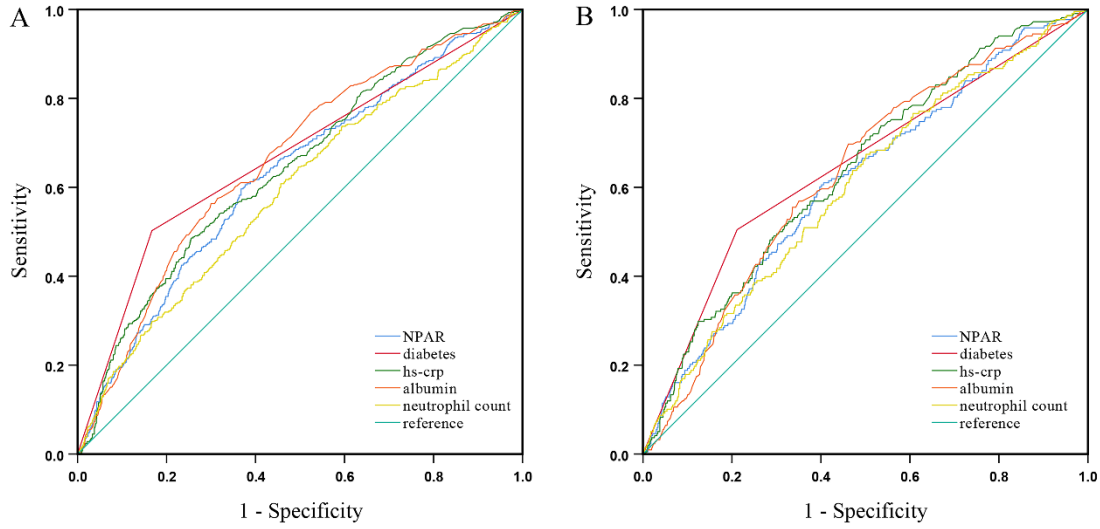

**Supplement Figure 1** The ROC curves of NPAR, hs-CRP, albumin, neutrophil count and diabetes (Supplement Figure 1A for all-cause mortality, Supplement Figure 1B for cardiovascular mortality) for predicting the all-cause and cardiovascular mortality in PD patients.

**Abbreviations:** NPAR, neutrophil percentage-to-albumin ratio; hs-crp, high sensitive C-reactive protein

**Supplement Table 1** Area under the ROC curves

|                  | All-cause mortality |         | Cardiovascular mortality |         |
|------------------|---------------------|---------|--------------------------|---------|
|                  | AUC                 | P-value | AUC                      | P-value |
| NPAR             | 0.62                | <0.001  | 0.61                     | <0.001  |
| diabetes         | 0.66                | <0.001  | 0.65                     | <0.001  |
| hs-CRP           | 0.64                | <0.001  | 0.64                     | <0.001  |
| albumin          | 0.65                | <0.001  | 0.63                     | <0.001  |
| neutrophil count | 0.59                | <0.001  | 0.59                     | <0.001  |

**Notes:** P<0.05 is considered statistically significant.

**Abbreviations:** AUC, area under the ROC curve; NPAR, neutrophil percentage-to-albumin ratio; hs-CRP, high sensitive C-reactive protein
